# Supplementary material for: Rodent Virus Diversity and Differentiation across Post-Katrina New Orleans
Source: MDPI journal article supplement (doi:10.3390/su13148034), 2021-07-19

## SUPPLEMENTAL MATERIALS

**Table S1.** Non-rarified list of blood-borne viruses detected in *Mus musculus*, *Rattus norvegicus*, and *Rattus rattus* collected across New Orleans, presented as the (#) number of positive pools, followed by the (%) percentage of positive pools (n = total number of pools).

| Virus                                | <i>Mus musculus</i> (n = 32) |                  | <i>Rattus norvegicus</i> (n = 35) |                  | <i>Rattus rattus</i> (n = 43) |                  |
|--------------------------------------|------------------------------|------------------|-----------------------------------|------------------|-------------------------------|------------------|
|                                      | # Pools Positive             | % Pools Positive | # Pools Positive                  | % Pools Positive | # Pools Positive              | % Pools Positive |
| Adeno-associated virus               | 2                            | 6.3              | 0                                 | 0                | 0                             | 0                |
| Anelloviridae sp.                    | 0                            | 0                | 25                                | 71.4             | 41                            | 95.3             |
| Beihai picobirna-like virus 8        | 5                            | 15.6             | 0                                 | 0                | 0                             | 0                |
| Chipmunk parvovirus                  | 5                            | 15.6             | 0                                 | 0                | 0                             | 0                |
| H-1 parvovirus                       | 1                            | 3.1              | 6                                 | 17.1             | 1                             | 2.3              |
| Iflaviridae sp.                      | 1                            | 3.1              | 0                                 | 0                | 0                             | 0                |
| Lymphocytic choriomeningitis virus   | 8                            | 25.0             | 0                                 | 0                | 0                             | 0                |
| Minute virus of mice                 | 1                            | 3.1              | 0                                 | 0                | 0                             | 0                |
| Mouse kidney parvovirus              | 9                            | 28.1             | 0                                 | 0                | 0                             | 0                |
| Mouse parvovirus 1                   | 24                           | 75.0             | 0                                 | 0                | 0                             | 0                |
| Murine adeno-associated virus 1      | 7                            | 21.9             | 0                                 | 0                | 0                             | 0                |
| Murine adeno-associated virus 2      | 1                            | 3.1              | 0                                 | 0                | 0                             | 0                |
| Murine adeno-associated virus [new]  | 16                           | 50.0             | 0                                 | 0                | 0                             | 0                |
| Murine adenovirus 1                  | 3                            | 9.4              | 1                                 | 2.9              | 0                             | 0                |
| Murine adenovirus 3                  | 0                            | 0                | 2                                 | 5.7              | 0                             | 0                |
| Murine bocavirus                     | 10                           | 31.3             | 0                                 | 0                | 0                             | 0                |
| Murine chapparvovirus                | 0                            | 0                | 2                                 | 5.7              | 1                             | 2.3              |
| Murine cytomegalovirus (strain K181) | 14                           | 43.8             | 0                                 | 0                | 0                             | 0                |
| Murine leukemia virus                | 31                           | 96.9             | 0                                 | 0                | 4                             | 9.3              |
| Mus musculus polyomavirus 2          | 12                           | 37.5             | 0                                 | 0                | 0                             | 0                |
| Rat adeno-associated virus           | 0                            | 0                | 2                                 | 5.7              | 0                             | 0                |
| Rat bocavirus                        | 0                            | 0                | 2                                 | 5.7              | 2                             | 4.7              |
| Rat cytomegalovirus                  | 0                            | 0                | 2                                 | 5.7              | 4                             | 9.3              |
| Rat Kobuvirus MM33                   | 0                            | 0                | 1                                 | 2.9              | 0                             | 0                |
| Rat leukemia virus                   | 0                            | 0                | 1                                 | 2.9              | 0                             | 0                |
| Rat minute virus                     | 0                            | 0                | 16                                | 45.7             | 2                             | 4.7              |
| Rat minute virus 1a                  | 0                            | 0                | 6                                 | 17.1             | 0                             | 0                |
| Rat minute virus 1b                  | 0                            | 0                | 6                                 | 17.1             | 0                             | 0                |
| Rat minute virus 1c                  | 0                            | 0                | 8                                 | 22.9             | 1                             | 2.3              |
| Rat minute virus 2a                  | 0                            | 0                | 4                                 | 11.4             | 0                             | 0                |
| Rat parvovirus 1a                    | 0                            | 0                | 5                                 | 14.3             | 0                             | 0                |
| Rat parvovirus 1b                    | 0                            | 0                | 1                                 | 2.9              | 0                             | 0                |
| Rat parvovirus 2                     | 0                            | 0                | 0                                 | 0                | 1                             | 2.3              |
| Rat parvovirus NTU1                  | 0                            | 0                | 5                                 | 14.3             | 5                             | 11.6             |
| Rattus norvegicus papillomavirus 1   | 0                            | 0                | 1                                 | 2.9              | 0                             | 0                |
| Rodent bocavirus                     | 4                            | 12.5             | 1                                 | 2.9              | 0                             | 0                |
| Rodent hepacivirus                   | 0                            | 0                | 23                                | 65.7             | 3                             | 7.0              |
| Rodent pegivirus                     | 0                            | 0                | 28                                | 80.0             | 0                             | 0                |
| Rodent Torque teno virus 1           | 0                            | 0                | 30                                | 85.7             | 42                            | 97.7             |
| Rodent Torque teno virus 2           | 0                            | 0                | 32                                | 91.4             | 15                            | 34.9             |
| Rodent Torque teno virus 3           | 0                            | 0                | 22                                | 62.9             | 21                            | 48.8             |
| Rodent Torque teno virus 4           | 0                            | 0                | 0                                 | 0                | 1                             | 2.3              |
| Torque teno mini virus 4             | 0                            | 0                | 0                                 | 0                | 1                             | 2.3              |
| Torque teno mini virus 5             | 0                            | 0                | 1                                 | 2.9              | 11                            | 25.6             |
| Torque teno virus                    | 0                            | 0                | 0                                 | 0                | 14                            | 32.6             |
| TTV-like mini virus                  | 0                            | 0                | 8                                 | 22.9             | 12                            | 27.9             |

**Figure S1.** Standardized rarefied virus richness in (A) *R. norvegicus* and (B) *R. rattus* from locations where both host species have been detected versus locations where each species has been detected without the other.

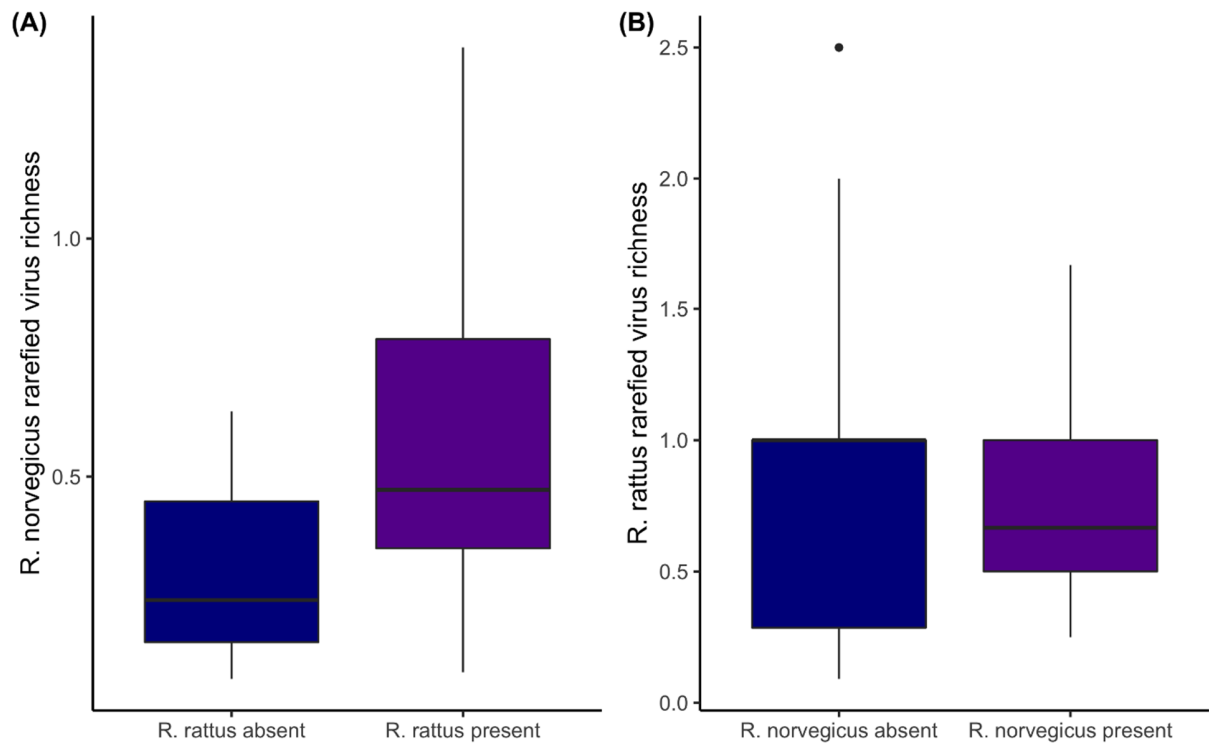

**Figure S2.** Linear regressions of rarified viral richness against (left) mean and (right) total abundance of each host (red = *Mus musculus*; green = *Rattus norvegicus*; blue = *Rattus rattus*) at a trapping site over all trapping seasons, with 95% confidence intervals (all, p-value > 0.05). Analyses were restricted to sites where rats and mice were trapped.

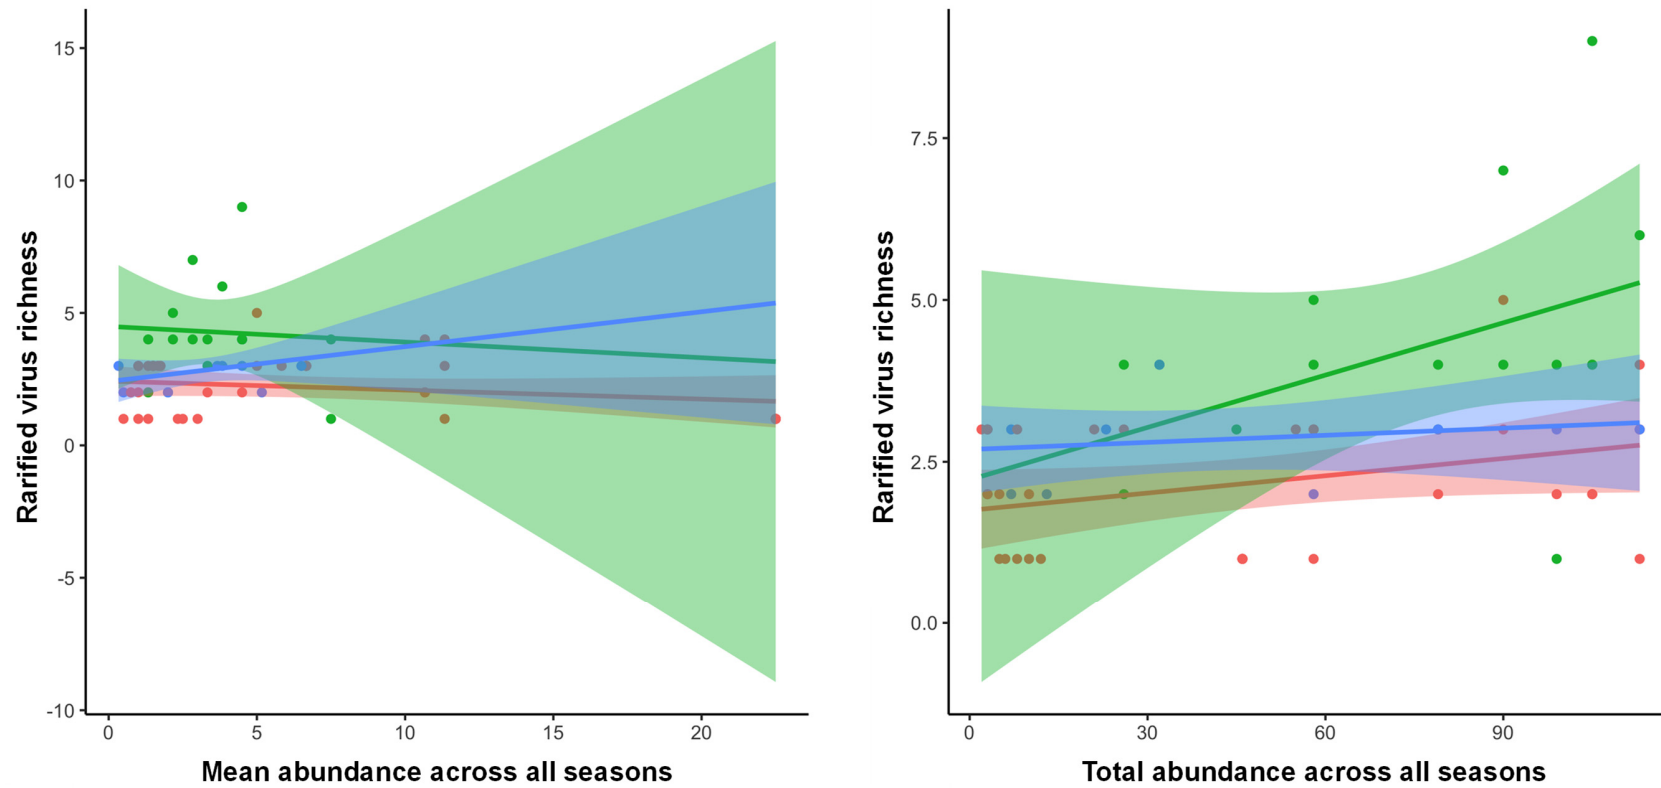

Supplement: s1 [file s1]
