# Supplementary material for: Rodent Virus Diversity and Differentiation across Post-Katrina New Orleans
Source: MDPI journal article supplement (doi:10.3390/su13148034), 2021-07-19
Supplement: s1 [file s1]

Archive with 1 entries (1 files):
- sustainability-1281288-supplementary.pdf
